# Supplementary material
Source: publisher site journal article supplement (https://www.dovepress.com/article/583981)
Supplement: Supplementary file 1 [file 583981%20Revised%20Supplementary%20Material%201.docx]

**Supplementary Material 1: Interview Guide:**

# BACKGROUND INFORMATION

- Can you please tell me a bit about yourself
- age, gender, level of training, family status (married, kids)

# ACADEMIC DAY AND DEDICATED LEARNING TIME

- How has transitioning from a half day to a full, dedicated academic day influenced your learning experience and academic preparation?
- How have the professional development sessions addressing time management, stress, and fatigue impacted your ability to navigate the challenges of residency?
- In what ways have the simulation sessions and workshops impacted your overall academic and clinical performance?

# SCHOLARLY ACTIVITES

• How has the redesigned research manual and the dedicated sessions on research proposals and manuscript writing impacted your research and scholarly pursuits?

# EXAM PREPERATION

- How do you perceive the impact of the addition of regular quizzes on your exam preparation and overall academic performance ?
- In what ways has the board review session mock examination impacted your academic preparation and overall academic performance?
- Explain why/ Elaborate / Give examples

# WORKING HOURS

- With the reduction of working hours from 24 hour duties to 12 hour shift, how has your overall academic performance been affected?
- Explain why/ Elaborate ? Give examples

# OVERALL WELL-BEING

- How do you perceive the impact of programmatic changes, such as professional development sessions, on fatigue and stress levels during your residency?
- How have the recent programmatic interventions affected your overall well-being?
- In what ways have the interventions such as dedicated academic days and reduced working hours, impacted your ability to maintain a healthy work - life balance?
- Elaborate / explain.
- How have the changes in working hours and the introduction of dedicated academic days affected collaboration, workflow and team dynamics among residents and faculty?
- In your perspective, how have the programatic changes such as reduced working hours impacted patient care?
